# Supplementary material for: One step synthesis of fluorescent carbon dots through pyrolysis of N-hydroxysuccinimide
Source: Royal Society of Chemistry journal article supplement (doi:10.1039/c4tc02382j), 2014-11-24
Supplement: c4tc02382j1.pdf [file c4tc02382j1.pdf]

## Supporting information

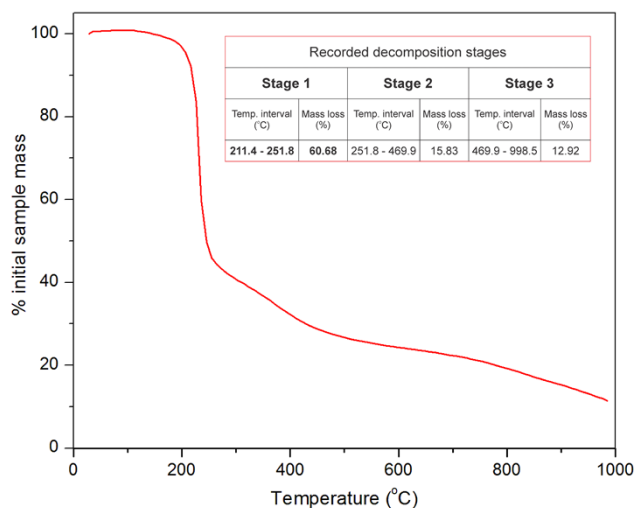

**Figure S1.** Thermal decomposition of unprocessed N-Hydroxysuccinimide

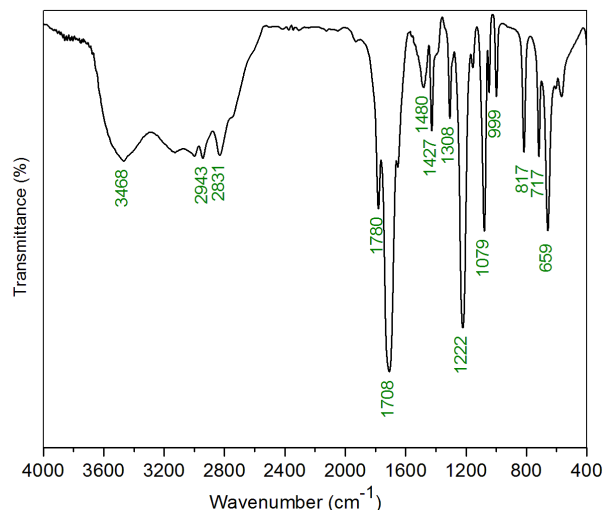

**Figure S2.** FT-IR spectra of N-Hydroxysuccinimide

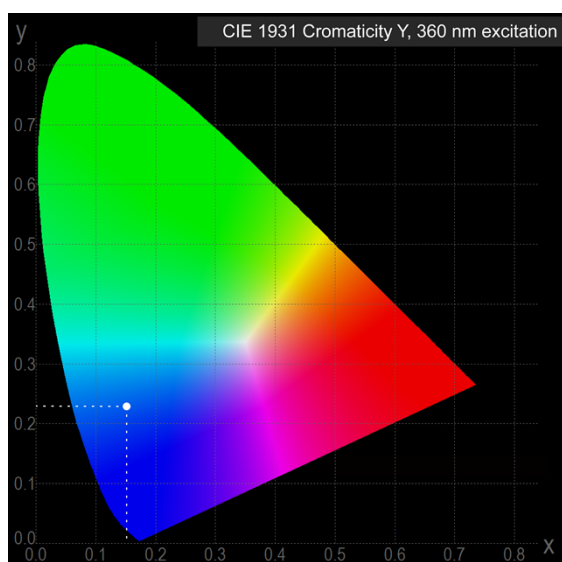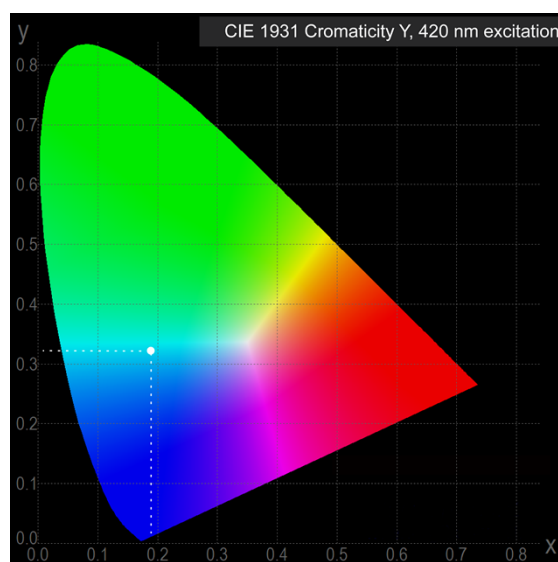

**Figure S3.** Chromaticity parameters according to CIE 1931 color space recorded for C-Dots dispersed in acetone at 360 (left) and 420 (right) nm excitation wavelengths
